# Supplementary material for: Hierarchical mesoporous octahedral K2Mn1−xCoxFe(CN)6 as a superior cathode material for sodium-ion batteries
Source: Royal Society of Chemistry journal article supplement (doi:10.1039/c6ta06658e), 2016-01-01
Supplement: c6ta06658e1.pdf [file c6ta06658e1.pdf]

## Supporting information

### **Hierarchical mesoporous octahedral $K_2Mn_{1-x}Co_xFe(CN)_6$ as a superior cathode material for sodium-ion batteries**

Xiaolei Jiang<sup>a\*</sup>, Hongjin Liu<sup>b</sup>, Jie Song<sup>b</sup>, Changfang Yin<sup>b</sup>, Huayun Xu<sup>b\*</sup>

*<sup>a</sup> School of Chemistry and Chemical Engineering, Linyi University, Linyi, 276000, P.R. China*

*<sup>b</sup> Key Laboratory of Colloid and Interface Chemistry, Ministry of Education School of Chemistry and Chemical Engineering, Shandong University, Jinan, 250100, P.R. China*

*\*Corresponding author:*

*Xiaolei Jiang*

*E-mail: jiangxiaolei@lyu.edu.cn*

*Huayun Xu*

*E-mail: xuhuayun@sdu.edu.cn*

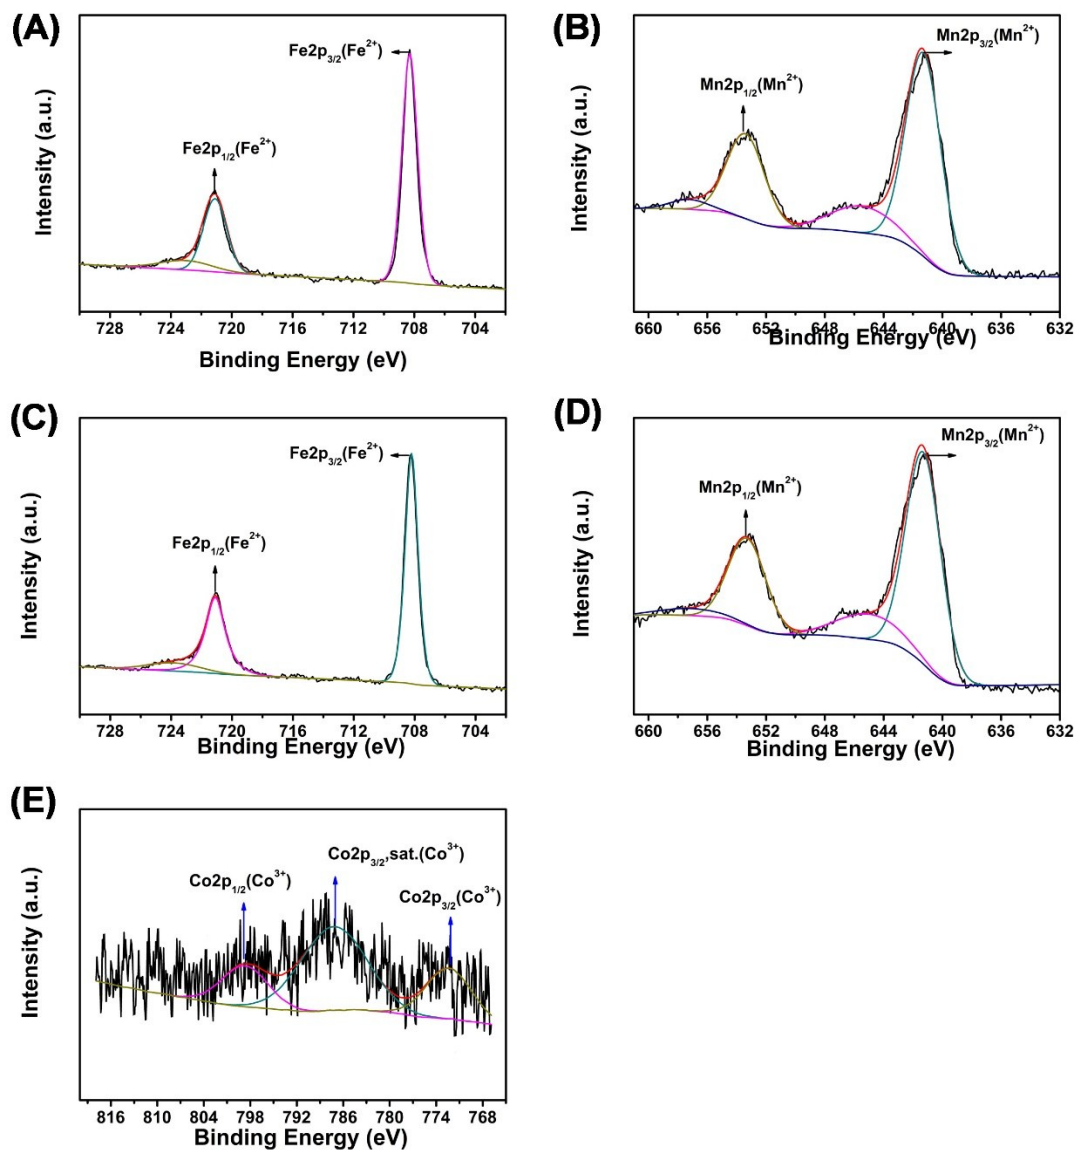

**Fig. S1** XPS spectra of (A) Fe2p and (B) Mn2p of KMCHFC ( $x=0$ ); (C) Fe2p, (D) Mn2p and (E) Co2p of KMCHFC ( $x=0.1$ ).

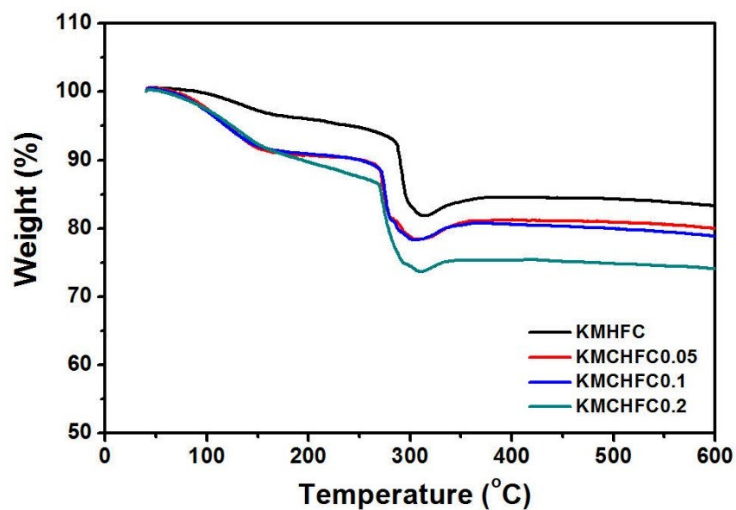

**Fig. S2** TG curve of KMCHFC ( $x=0, 0.05, 0.1, 0.2$ ). TG measurement was carried out at a heating rate of  $10\text{ }^{\circ}\text{C min}^{-1}$  in air.

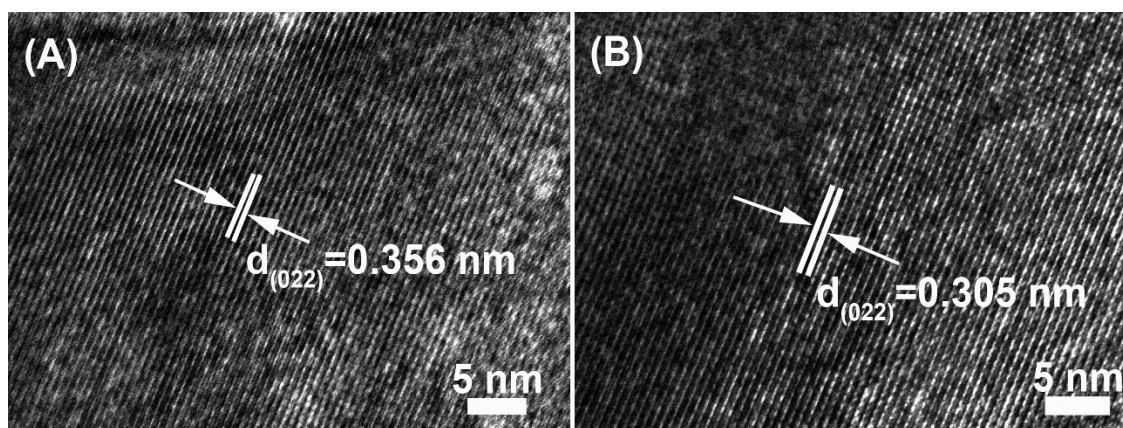

**Fig.S3** HRTEM images of (A) KMHFC and (B) KMCHFC ( $x=0.1$ ).

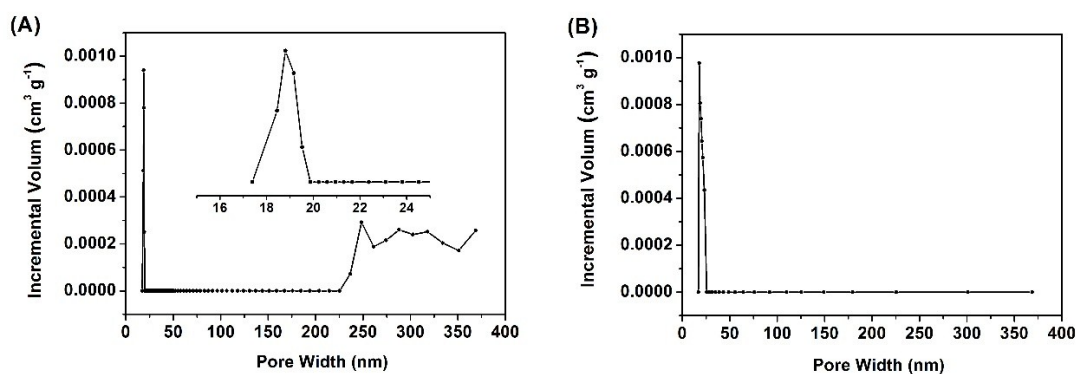

**Fig. S4** The pore-size-distribution curves of (A) KMHFC and (B) KMCHFC ( $x=0.1$ ) using DFT method. The model is  $\text{N}_2$ -cylindrical pores in an Oxide surface at 77K.

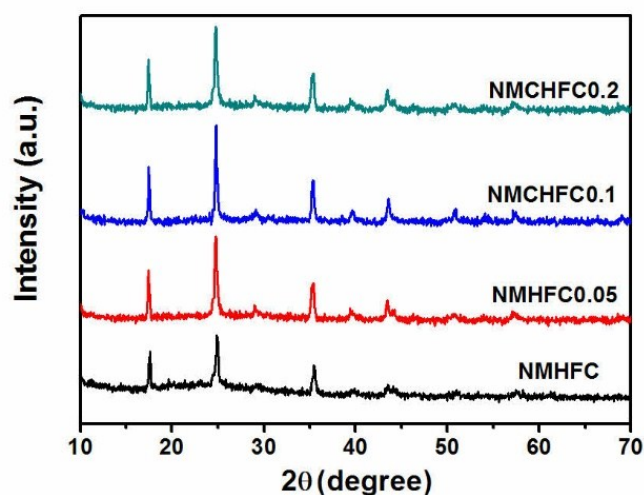

**Fig. S5** XRD patterns of KMCHFC ( $x=0, 0.05, 0.1, 0.2$ ) after 1 cycle.

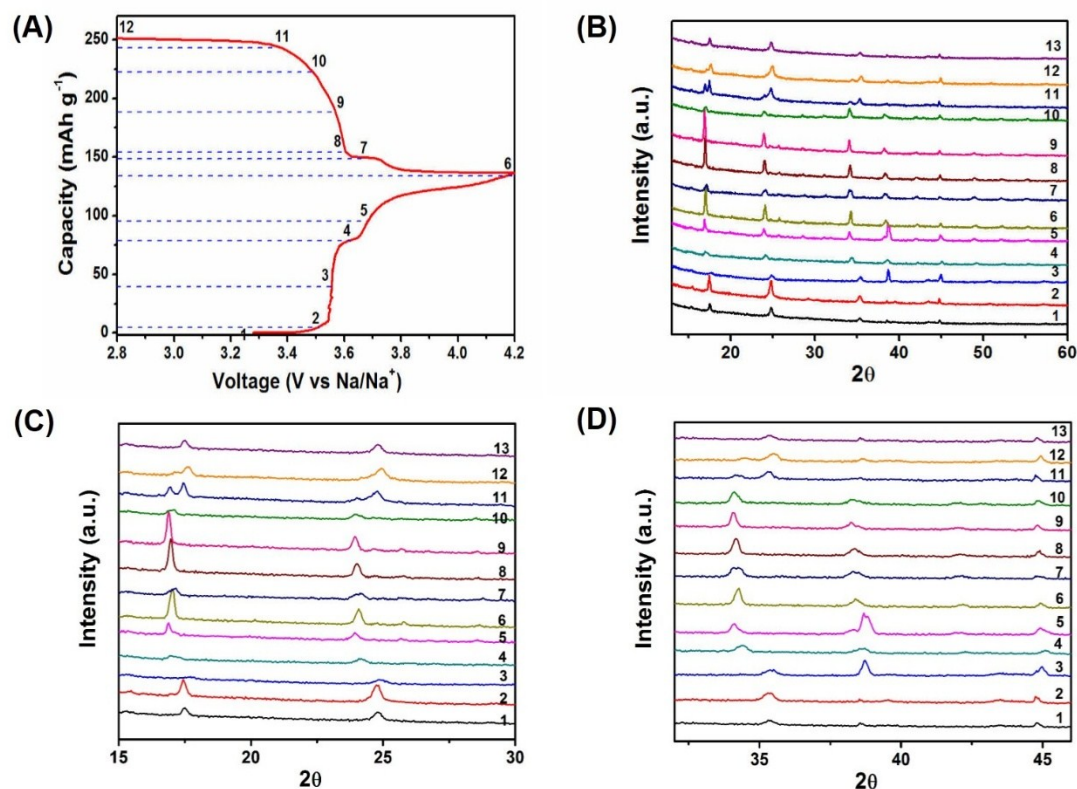

**Fig. S6** (A) Charge/discharge profiles of the KMCHFC ( $x=0.1$ ) electrode tested at 1st charge-discharge process, the numbers 1-12 stand for the depths of charge/discharge; (B) XRD patterns of the electrode at various states (the number 13 was taken for the electrode when the voltage goes down to 2 V); (C-D) The corresponding magnified

XRD patterns.

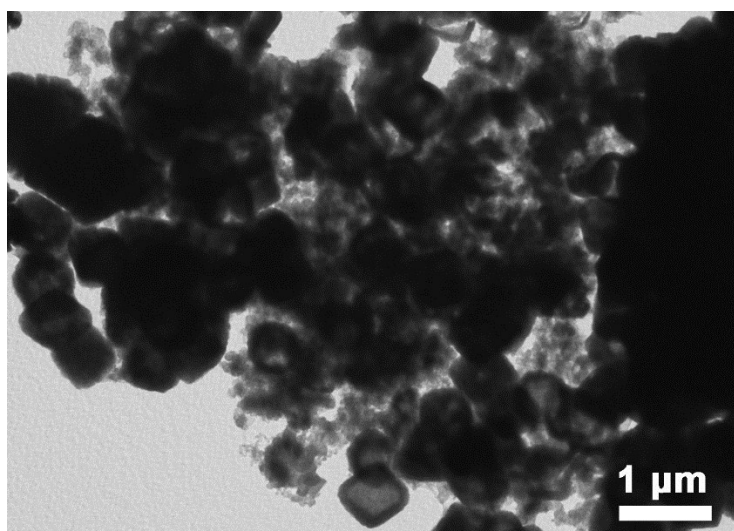

**Fig. S7** TEM images of the electrodes made of KMCHFC ( $x=0.1$ ) after 150 cycles.

**Table S1** Unit cell parameters of  $K_2Mn_{1-x}Co_xFe(CN)_6$  ( $x=0, 0.05, 0.1, 0.2$ )

| Samples             | a (Å) | b (Å) | c (Å) |
|---------------------|-------|-------|-------|
| KMHFC               | 15.12 | 15.12 | 18.20 |
| KMCHFC ( $x=0.05$ ) | 15.09 | 15.09 | 18.09 |
| KMCHFC ( $x=0.1$ )  | 15.07 | 15.07 | 17.98 |
| KMCHFC ( $x=0.2$ )  | 15.04 | 15.04 | 17.89 |

**Table S2** Unit cell parameters of  $K_2Mn_{1-x}Co_xFe(CN)_6$  ( $x=0, 0.05, 0.1, 0.2$ ) after 1 cycle

| Samples             | a (Å) | b (Å) | c (Å) |
|---------------------|-------|-------|-------|
| NMHFC               | 15.10 | 15.10 | 18.14 |
| NMCHFC ( $x=0.05$ ) | 15.06 | 15.06 | 18.07 |
| NMCHFC ( $x=0.1$ )  | 15.02 | 15.02 | 17.95 |
| NMCHFC ( $x=0.2$ )  | 14.98 | 14.98 | 17.84 |

**Table S3** EIS parameters and diffusion coefficient of sodium ion for KMCHFC ( $x=0$ , 0.05, 0.1, 0.2)

| Samples  | $R_s$ ( $\Omega$ ) | $R_f$ ( $\Omega$ ) | $R_{ct}$ ( $\Omega$ ) | $\sigma$ ( $\Omega \text{ cm}^2 \text{ s}^{-0.5}$ ) | $D$ ( $\text{cm}^2 \text{ s}^{-1}$ ) |
|----------|--------------------|--------------------|-----------------------|-----------------------------------------------------|--------------------------------------|
| $x=0$    | 5.0                | 358.9              | 2120                  | 83.0                                                | 5.27E-14                             |
| $x=0.05$ | 3.9                | 264.8              | 1910                  | 63.5                                                | 9.01E-14                             |
| $x=0.1$  | 3.5                | 220.0              | 992                   | 3.0                                                 | 4.04E-11                             |
| $x=0.2$  | 3.2                | 194.5              | 1640                  | 50.0                                                | 1.45E-13                             |
